# Supplementary material for: Ultrasonication of Thawed Huyou Juice: Effects on Cloud Stability, Physicochemical Properties and Bioactive Compounds
Source: MDPI journal article supplement (doi:10.3390/foods10081695), 2021-07-22
Supplement: s1 [file s1]

## Supplemental materials

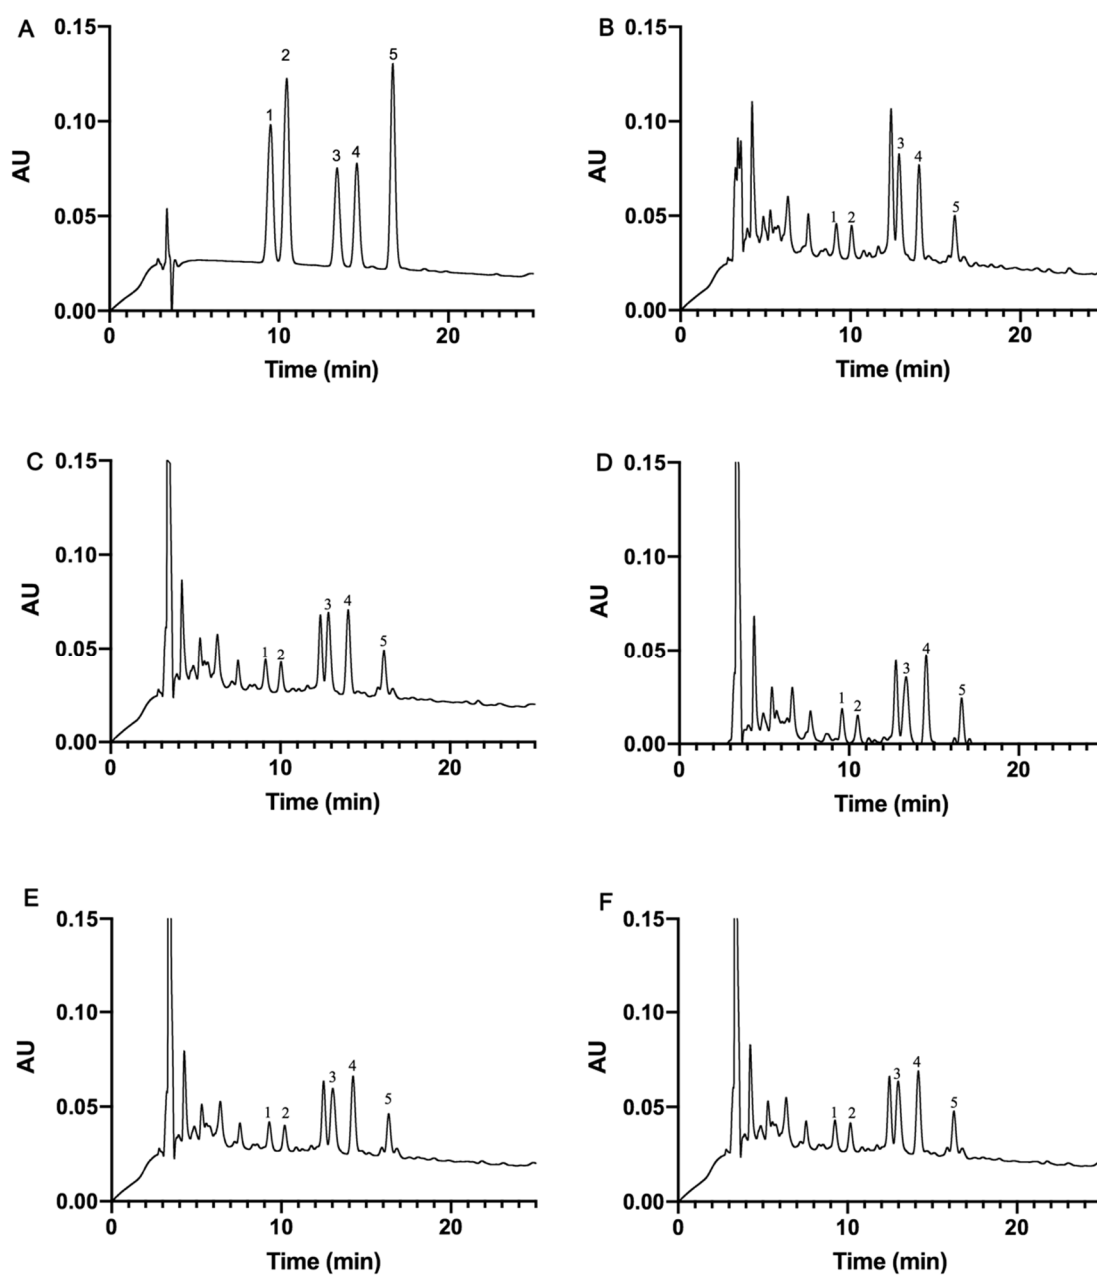

**Figure S1.** HPLC chromatograms of five flavonoid standards and flavonoids in samples.

(A) Flavonoid standard solution; (B) Fresh Huyou juice; (C) Thawed Huyou juice without ultrasonication stored for 0 days; (D) Thawed Huyou juice without ultrasonication stored for 7 days; (E) Thawed Huyou juice which was treated with ultrasonic power of 360 W for 30 min and then stored for 0 days; (F) Thawed Huyou juice which was treated with ultrasonic power of 360 W for 30 min and then stored for 7 days.

Peak numbers: 1-Eriocitrin; 2-Neoeriocitrin; 3-Narirutin; 4)-Naringin; 5-Neohesperidin.

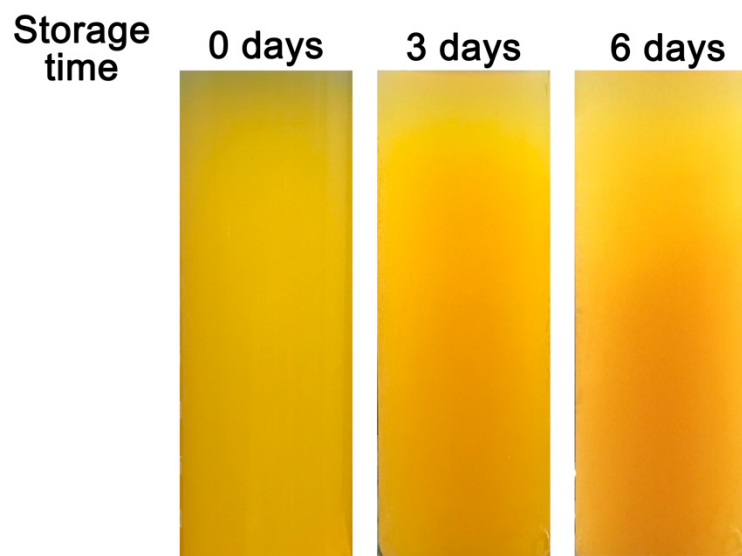

**Figure S2.** Appearance of fresh Huyou juice during storage.
